# Supplementary material for: Three Months-Old’ Preferences for Biological Motion Configuration and Its Subsequent Decline
Source: MDPI journal article supplement (doi:10.3390/brainsci12050566), 2022-04-27
Supplement: s1 [file s1]

**Table S1.** Total looking time and mean proportion of looking at the coherent and scrambled point-light walkers (PLWs) per subject (final sample) and age group in Experiment 1 (cross-sectional).

| Age<br>(in months) | Subject ID | Total Looking time<br>(in secs) |               | Mean Proportion of Looking |               |
|--------------------|------------|---------------------------------|---------------|----------------------------|---------------|
|                    |            | Coherent PLW                    | Scrambled PLW | Coherent PLW               | Scrambled PLW |
| 3                  | 1          | 155.89                          | 85.73         | 0.65                       | 0.36          |
|                    | 2          | 134.09                          | 79.53         | 0.63                       | 0.43          |
|                    | 3          | 129.13                          | 107.95        | 0.54                       | 0.41          |
|                    | 4          | 128.72                          | 93.23         | 0.58                       | 0.43          |
|                    | 5          | 173.56                          | 138.02        | 0.56                       | 0.42          |
|                    | 6          | 154.54                          | 128.87        | 0.55                       | 0.46          |
|                    | 7          | 208.93                          | 136.12        | 0.61                       | 0.39          |
|                    | 8          | 237.96                          | 115.26        | 0.67                       | 0.33          |
|                    | 9          | 165.41                          | 155.01        | 0.52                       | 0.50          |
|                    | 10         | 262.68                          | 77.3          | 0.77                       | 0.22          |
|                    | 11         | 89.48                           | 170.2         | 0.34                       | 0.62          |
|                    | 12         | 218.62                          | 107.7         | 0.67                       | 0.34          |
|                    | 13         | 165.4                           | 114.02        | 0.59                       | 0.42          |
|                    | 14         | 159.73                          | 55.62         | 0.74                       | 0.28          |
|                    | 15         | 203.26                          | 110.07        | 0.65                       | 0.36          |
|                    | 16         | 174.86                          | 129.65        | 0.57                       | 0.43          |
|                    | 17         | 190.67                          | 92.68         | 0.67                       | 0.33          |
| 5                  | 1          | 125.75                          | 97.03         | 0.56                       | 0.42          |
|                    | 2          | 162.54                          | 125.05        | 0.57                       | 0.42          |
|                    | 3          | 145.77                          | 156.92        | 0.48                       | 0.53          |
|                    | 4          | 90.45                           | 143.39        | 0.39                       | 0.6           |
|                    | 5          | 177.26                          | 20.99         | 0.89                       | 0.16          |
|                    | 6          | 104.01                          | 105.01        | 0.50                       | 0.5           |
|                    | 7          | 110.12                          | 99.6          | 0.53                       | 0.45          |
|                    | 8          | 168.53                          | 154.57        | 0.52                       | 0.48          |
|                    | 9          | 65.41                           | 125.57        | 0.34                       | 0.66          |
|                    | 10         | 129.42                          | 101.4         | 0.56                       | 0.45          |
|                    | 11         | 130.5                           | 161.04        | 0.45                       | 0.56          |
|                    | 12         | 140.12                          | 153.02        | 0.48                       | 0.51          |
|                    | 13         | 128.19                          | 129.62        | 0.50                       | 0.50          |
|                    | 14         | 143.55                          | 169.58        | 0.46                       | 0.56          |
|                    | 15         | 179.81                          | 80.07         | 0.69                       | 0.31          |
|                    | 16         | 81.79                           | 185.21        | 0.31                       | 0.65          |
|                    | 17         | 100.6                           | 88.73         | 0.53                       | 0.46          |

**Table S2.** Total looking time and mean proportion of looking at the coherent and scrambled point-light walkers (PLWs) per subject (final sample) and age group in Experiment 2 (longitudinal).

| Age<br>(in months) | Subject ID | Total Looking Time<br>(in secs) |               | Mean Proportion of Looking |               |
|--------------------|------------|---------------------------------|---------------|----------------------------|---------------|
|                    |            | Coherent PLW                    | Scrambled PLW | Coherent PLW               | Scrambled PLW |
| 3                  | 1          | 155.89                          | 85.73         | 0.65                       | 0.35          |
|                    | 19         | 129.13                          | 107.95        | 0.54                       | 0.46          |
|                    | 21         | 173.56                          | 138.02        | 0.56                       | 0.44          |
|                    | 26         | 154.54                          | 128.87        | 0.55                       | 0.45          |
|                    | 28         | 208.93                          | 136.12        | 0.61                       | 0.39          |
|                    | 30         | 237.96                          | 115.26        | 0.67                       | 0.33          |
|                    | 32         | 165.41                          | 155.01        | 0.52                       | 0.48          |
|                    | 41         | 262.68                          | 77.30         | 0.77                       | 0.23          |
|                    | 54         | 89.48                           | 170.20        | 0.34                       | 0.66          |
|                    | 55         | 218.62                          | 107.70        | 0.67                       | 0.33          |
|                    | 56         | 165.40                          | 114.02        | 0.59                       | 0.41          |
|                    | 57         | 159.73                          | 55.62         | 0.74                       | 0.26          |
|                    | 60         | 203.26                          | 110.07        | 0.65                       | 0.35          |
|                    | 73         | 174.86                          | 129.65        | 0.57                       | 0.43          |
| 5                  | 21         | 74.48                           | 113.64        | 0.40                       | 0.60          |
|                    | 28         | 106.41                          | 82.00         | 0.56                       | 0.44          |
|                    | 30         | 59.61                           | 64.01         | 0.48                       | 0.52          |
|                    | 34         | 96.53                           | 88.83         | 0.52                       | 0.48          |
|                    | 41         | 91.20                           | 84.42         | 0.52                       | 0.48          |
|                    | 42         | 106.22                          | 87.50         | 0.55                       | 0.45          |
|                    | 54         | 65.70                           | 74.28         | 0.47                       | 0.53          |
|                    | 55         | 73.01                           | 55.85         | 0.57                       | 0.43          |
|                    | 56         | 89.06                           | 88.15         | 0.50                       | 0.50          |
|                    | 57         | 71.95                           | 60.24         | 0.54                       | 0.46          |
|                    | 58         | 66.05                           | 62.06         | 0.52                       | 0.48          |
|                    | 60         | 71.67                           | 56.99         | 0.56                       | 0.44          |
|                    | 73         | 104.49                          | 70.92         | 0.60                       | 0.40          |
|                    | 1          | 67.07                           | 58.97         | 0.53                       | 0.47          |
| 7                  | 19         | 82.73                           | 68.84         | 0.55                       | 0.45          |
|                    | 21         | 67.38                           | 56.91         | 0.54                       | 0.46          |
|                    | 26         | 17.77                           | 21.57         | 0.45                       | 0.55          |
|                    | 28         | 56.28                           | 45.55         | 0.55                       | 0.45          |

|  |    |       |       |      |      |
|--|----|-------|-------|------|------|
|  | 30 | 43.25 | 63.98 | 0.40 | 0.60 |
|  | 32 | 63.22 | 67.90 | 0.48 | 0.52 |
|  | 34 | 58.20 | 61.47 | 0.49 | 0.51 |
|  | 41 | 62.59 | 74.32 | 0.46 | 0.54 |
|  | 42 | 68.14 | 61.34 | 0.53 | 0.47 |
|  | 54 | 52.04 | 41.33 | 0.56 | 0.44 |
|  | 55 | 49.70 | 40.47 | 0.55 | 0.45 |
|  | 56 | 76.87 | 64.18 | 0.54 | 0.46 |
|  | 58 | 57.28 | 39.46 | 0.59 | 0.41 |
|  | 60 | 66.21 | 48.16 | 0.58 | 0.42 |
|  | 73 | 73.11 | 67.30 | 0.52 | 0.48 |
